# Supplementary material for: TiO2/ZnO nanocomposites with a metal-free dye and a polymer gel electrolyte: optimizing photovoltaic efficiency and assessing stability via time series analysis
Source: Royal Society of Chemistry journal article supplement (doi:10.1039/d4ya00553h), 2025-01-01
Supplement: d4ya00553h1.pdf [file d4ya00553h1.pdf]

## Supporting Information

# TiO<sub>2</sub>/ZnO Nanocomposites with Metal-Free Dye and Polymer Gel Electrolyte: Optimizing Photovoltaic Efficiency and Assessing Stability by Time Series Analysis

Prakash S. Pawar<sup>a,b</sup>, Pramod A. Koyale<sup>c</sup>, Satyajeet S. Patil<sup>d</sup>, Swapnil R. Patil<sup>e</sup>, Jinho Bae<sup>e</sup>,  
Nilesh R. Chodankar<sup>f</sup>, Yash G. Kapdi<sup>g</sup>, Saurabh S. Soni<sup>g</sup>, Pramod S. Patil<sup>d,h</sup>, Sagar D.  
Delekar<sup>a,\*</sup>

<sup>a</sup>Department of Chemistry, Shivaji University, Kolhapur 416004, Maharashtra, India

<sup>b</sup>Department of Chemistry, Shri. Yashwantrao Patil Science College, Solankur, Kolhapur  
416216, Maharashtra, India

<sup>c</sup>School of Nanoscience and Biotechnology, Shivaji University, Kolhapur 416004,  
Maharashtra, India

<sup>d</sup>Thin Film Materials Laboratory, Department of Physics, Shivaji University, Kolhapur  
416004, Maharashtra, India

<sup>e</sup>Department of Ocean System Engineering, Jeju National University, 102 Jejudaehakro, Jeju  
63243, Republic of Korea.

<sup>f</sup>Mechanical Engineering Department, Khalifa University of Science and Technology, Abu  
Dhabi 127788, United Arab Emirates

<sup>g</sup>Department of Chemistry, Sardar Patel University, Vallabh Vidyanagar, Anand, Gujarat  
388120, India

<sup>h</sup>Honorary University Chair Professor, National Dong Hwa University, Hualien, 974301,  
Taiwan

**\*Corresponding Author:** Prof. Sagar D. Delekar (sdd\_chem@unishivaji.ac.in)

## **Experimental Section**

### **Synthesis of TiO<sub>2</sub> nanoparticles (NPs)**

TiO<sub>2</sub> NPs were synthesized via sonochemical assisted sol-gel technique, which was reported previously by our research group<sup>1</sup>. Initially, titanium tetraisopropoxide [Ti (OCH (CH<sub>3</sub>)<sub>2</sub>)<sub>4</sub>] (IV) was added to glacial acetic acid with constant stirring to form a clear solution. To avoid the agglomeration, sodium dodecyl sulfide (NaC<sub>12</sub>H<sub>25</sub>SO<sub>4</sub>) was added to the above clear solution followed by the addition of 100 mL distilled water (DW) with constant stirring for 3 hrs. at 60°C. Thereafter, a dilute solution of sodium hydroxide (NaOH) was added for complete hydroxylation to form titanium hydroxide [Ti (OH)<sub>2</sub>]. The above solution of Ti (OH)<sub>2</sub> was heated to 60°C with constant stirring for 3 hrs. Afterward, the solution was cooled and centrifuged followed by washing with DW. The final white-colored powder of TiO<sub>2</sub> NPs was obtained after calcination at 450°C for 2 hrs.

### **Synthesis of ZnO nanorods (NRs)**

ZnO NRs were prepared by using zinc nitrate as precursors [Zn (NO<sub>3</sub>)<sub>2</sub>].6H<sub>2</sub>O, as per the above synthetic route of TiO<sub>2</sub> NPs.

### **Characterization Tool**

Optical properties were studied using UV-visible diffuse reflectance spectra (DRS) through a UV-visible spectrophotometer (LABINDIA, UV 3092) and photoluminance spectra (PL) analysis through a PL spectrophotometer (Jasco Spectrofluorometer, FP-8300). The x-ray diffraction (XRD) (Bruker, AXS D8 Advance) equipped with a Cu K $\alpha$  target having a wavelength ( $\lambda$ ) of 1.5046 Å and diffraction angle ( $2\theta$ ) ranged from 10° to 80°. X-ray photoelectron spectroscopy (XPS) analysis was recorded at  $1.0 \times 10^{-9}$  Torr base pressure with a monochromatic Al-K $\alpha$  X-ray source (ESCALAB 250XI, Thermo Fisher Scientific). The surface morphology and elemental compositions were assessed using a scanning electron microscope with a built-in energy dispersive X-ray spectroscopy (EDX) testing facility (MIRA-3 TESCON FESEM). High-resolution transmission electron microscopy (HR-TEM) images and EDX mapping were captured utilizing the TEM (Talos F200X G2) housed at Jeju National University. To prepare the sample for HR-TEM analysis, a minor quantity of the TZ-3 NCs powders was dispersed in ethanol, followed by 15 min of bath sonication. Subsequently, the resulting dispersions were dropcasted onto a 3 mm carbon film-coated Cu grid with a mesh size of 200 (SPI). Surface area and pore size analysis were executed using a Brunauer–Emmett–Teller (BET) surface analyzer (Quantachrome NOVA1000e, USA).

Further, I–V measurements of the device were carried out using a Keithley2400sourcemeater and solar simulator (PET, USA) with a 100Wxenon lamp as a light source equipped with a band pass filter, and light intensity was set to 100 mW/cm<sup>2</sup> (Si-photodiode standard were used to calibrate the light intensity) with one sun illumination were employed to knowing the light to electricity conversion efficiency.

## Result and Discussion

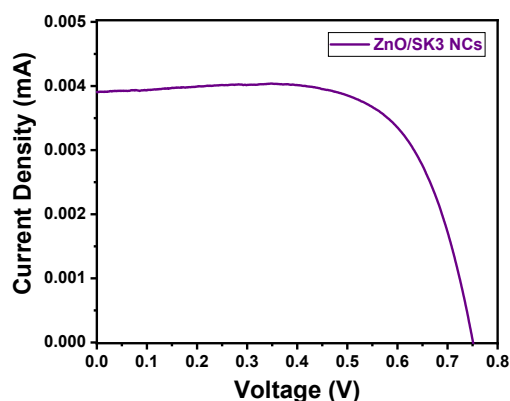

**Figure S1.** I-V curve for ZnO/SK3-based DSSCs under AM 1.5G sunlight condition.

**Table S1.** The statistical data of photovoltaic performance

| Sample                | $J_{SC}$ (mA.cm <sup>-2</sup> ) | $V_{OC}$ (V) | $I_{MP}$ (mA.cm <sup>-2</sup> ) | $V_{MP}$ (V) | FF (%) | $\eta$ (%)  |
|-----------------------|---------------------------------|--------------|---------------------------------|--------------|--------|-------------|
| TiO <sub>2</sub> /SK3 | 4.07 ± 0.1                      | 0.94 ± 0.02  | 2.91 ± 0.09                     | 0.82 ± 0.02  | 62.37  | 2.38 ± 0.04 |
| ZnO/SK3               | 3.90 ± 0.07                     | 0.75 ± 0.03  | 3.56 ± 0.07                     | 0.56 ± 0.02  | 68.15  | 1.99 ± 0.02 |
| TZ-1/ SK3             | 5.72 ± 0.08                     | 0.80 ± 0.01  | 4.94 ± 0.08                     | 0.68 ± 0.01  | 73.40  | 3.05 ± 0.03 |
| TZ-3/ SK3             | 7.17 ± 0.04                     | 0.89 ± 0.01  | 6.49 ± 0.05                     | 0.66 ± 0.01  | 67.12  | 4.30 ± 0.01 |
| TZ-5/ SK3             | 6.49 ± 0.09                     | 0.93 ± 0.02  | 5.53 ± 0.08                     | 0.72 ± 0.01  | 65.96  | 3.98 ± 0.02 |

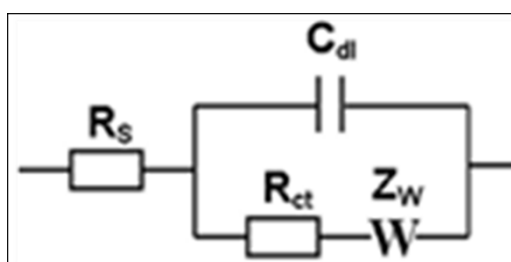

**Figure S2.** Equivalent circuit model by EIS analysis.

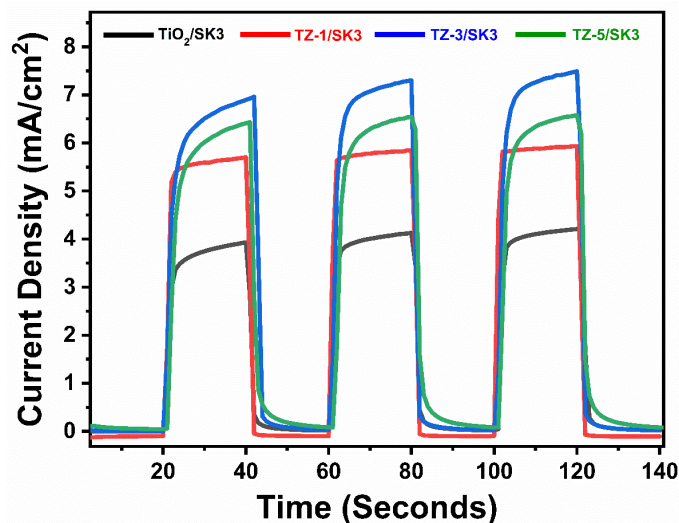

**Figure S3.** Chronoamperometric stability for designed photoanodes.

**Figure S4 (a)** shows UV-visible DRS spectra and band gap energy of synthesized bare TiO<sub>2</sub> NPs, TZ-1, TZ-3, and TZ-5 NCs samples recorded in the wavelength region of 200–800 nm. All samples were recorded, absorption in UV region as well as visible region appearance with high transparency. From the UV-DRS spectra, TiO<sub>2</sub> NPs show an absorption peak of 374.01 nm, due to the electron transfer from the valence to the conduction band (i.e. band to band transition)<sup>2</sup>. Accordingly, the absorption of NCs slightly shifted towards a red shift with increasing the concentration of ZnO in TiO<sub>2</sub> NPs (i.e. TZ-1, TZ-3, and TZ-5) may be due to the synergistic impact. Further, the band gap energy was calculated by using Tauc plots of synthesized TiO<sub>2</sub> NPs observed at 3.21 eV. Further, the band gap energy of TZ-1, TZ-3, and TZ-5 NCs corresponds to 3.17 eV, 3.13 eV, and 3.06 eV respectively, which confirms the addition of ZnO content into TiO<sub>2</sub> NPs, band gap energy becomes slightly decreased and shown in **Figure S4 (b)**. Due to the increase in light absorption intensity in TiO<sub>2</sub>-ZnO NCs also it may be due to the combined effect of E<sub>g</sub> of anatase TiO<sub>2</sub> (3.20 eV) and ZnO (3.3 eV). Furthermore, ZnO may also serve as a constituent in TZ-1, TZ-3, and TZ-5 NCs. Also, the interfacial coupling effect between TiO<sub>2</sub> and ZnO NPs can cause the red shift in the band gap<sup>3,4</sup>.

The photoluminescence (PL) technique is an essential tool to study the electron-hole pair recombination process occurring in a semiconductor. The low PL intensity reveals the low recombination of electron-hole pairs. The PL spectra of synthesized TiO<sub>2</sub> NPs and TZ-3 (7:3 molar ratios) NCs were indicated in **Figure S4 (c)**. The excitation wavelength of synthesized TiO<sub>2</sub> NPs is 361.64 nm as well as TZ-3 NCs 370.35 nm. Furthermore, the emission peaks of the bare TiO<sub>2</sub> NPs and TZ-3 NCs observed at NPs are 411.70 nm and 415.99 nm corresponding to 3.011 eV and 2.98 eV<sup>5</sup>. Also, the PL intensity of bare TiO<sub>2</sub> NPs is higher as

well as higher recombination of photo-excited electrons and holes than the TZ-3 NCs. Due to the different favorable redox energy levels of the valence band and conduction band of the  $\text{TiO}_2$  and  $\text{ZnO}$ , this leads to the effective interfacial charge transfer process and thereby minimizes the electron and hole recombination process<sup>6</sup>. Herein, PL analysis does not show a noticeable difference between bare  $\text{TiO}_2$  and TZ-3 NCs, since the content of  $\text{ZnO}$  NRs with  $\text{TiO}_2$  lattice in TZ-3 NCs is less compared to host materials, affecting less PL spectrum of NCs which might also show comparable recombination rate. As well as the decreased PL intensity after the engineering of the  $\text{TiO}_2$  lattice revealed reductions in the radiative recombination of photoinduced electrons trapped at the surface of  $\text{TiO}_2$  with the content of  $\text{ZnO}$  NPs, so the said NCs exhibited efficient charge separation as well as transportation<sup>7</sup>.

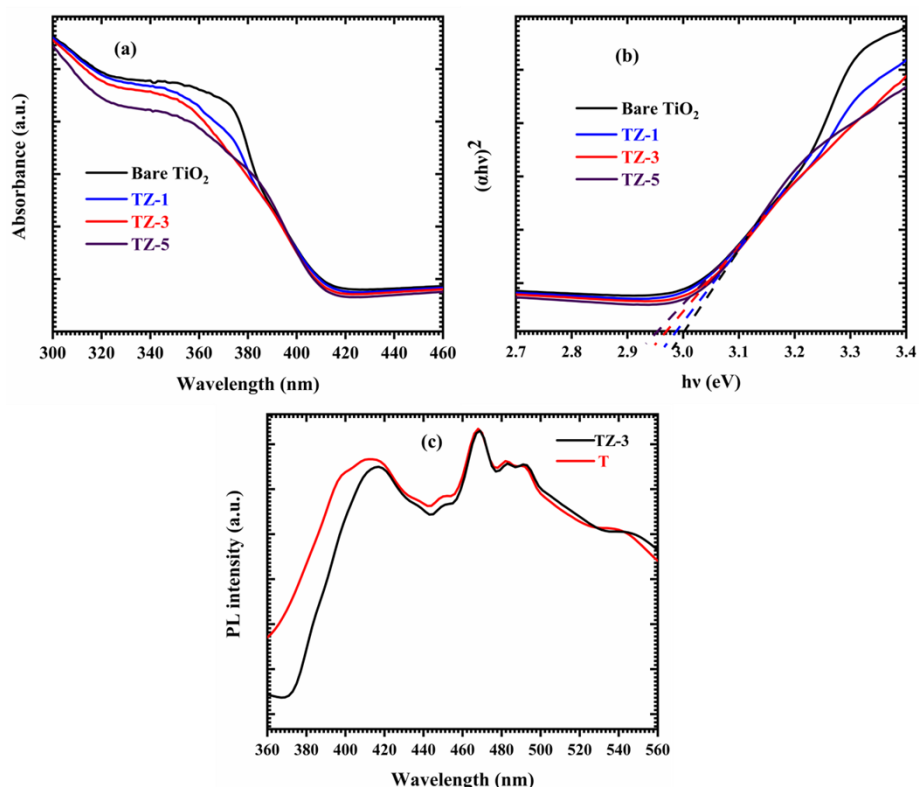

**Figure S4.** a) UV-visible diffuse reflectance spectroscopy (absorption mode), b) Tauc plot  $(\alpha h\nu)^2$  versus photon energy ( $h\nu$ ) with varying content ZnO NPs in TZ NCs, c) PL Spectra of synthesized TZ-3 NCs, and  $\text{TiO}_2$  NPs.

**Table S2.** Calculated bandgap values of synthesized TiO<sub>2</sub> NPs, TZ-1, TZ-3, and TZ-5 NCs as a photoanode from Tauc plots

| Sample               | Band gap (eV) |
|----------------------|---------------|
| TiO <sub>2</sub> NPs | 3.21          |
| TZ-1 NCs             | 3.17          |
| TZ-3 NCs             | 3.13          |
| TZ-5 NCs             | 3.06          |

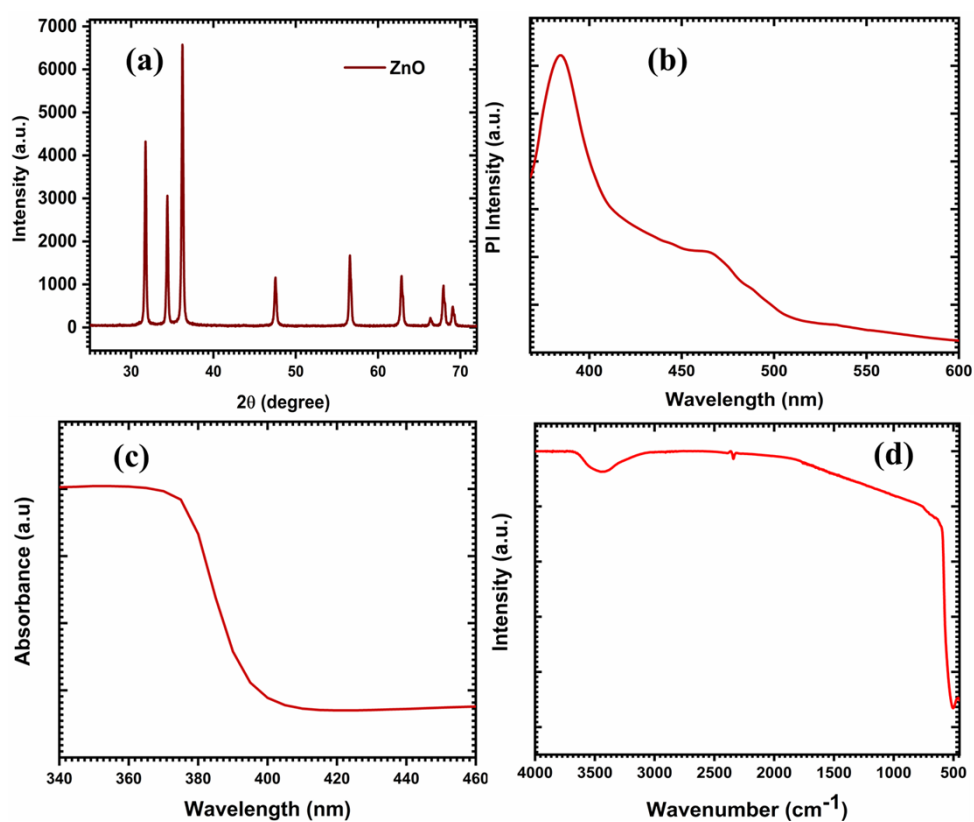

**Figure S5.** a) XRD, b) photoluminance analysis, c) UV-visible DRS, and d) FT-IR analysis of bare ZnO NRs.

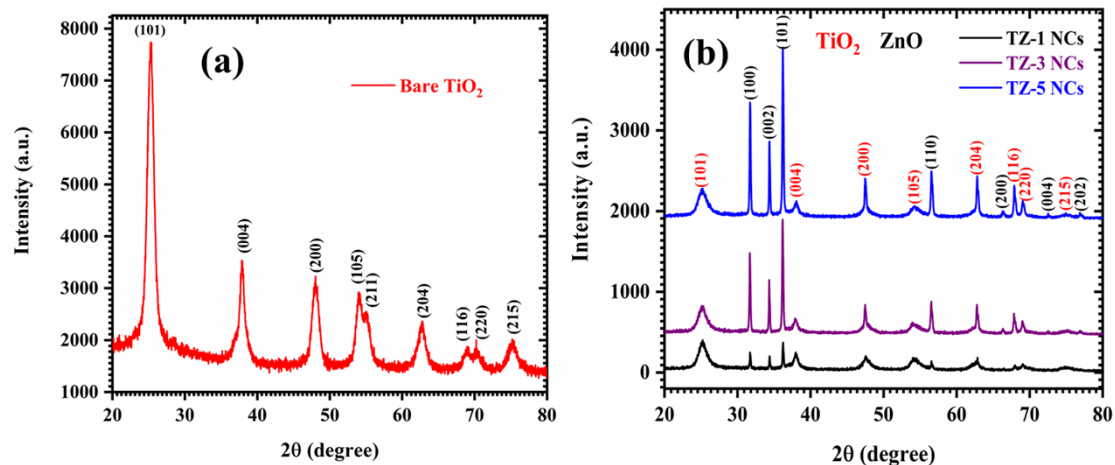

**Figure S6.** XRD pattern of synthesized a)  $\text{TiO}_2$  NPs, b) TZ-1, TZ-3 and TZ-5 NCs.

FT-IR spectra have been performed to demonstrate the functional group and M-O bond presence in synthesized  $\text{TiO}_2$  NPs and TZ-3 NCs samples were recorded in wave number range from  $4000$  to  $400\text{ cm}^{-1}$  and shown in **Figure S7**. The peak position at  $468.94\text{ cm}^{-1}$  to  $797.26\text{ cm}^{-1}$  assigned to the symmetric stretching frequency of O-Ti-O, Ti-O-Ti, Zn-O-Ti, and Zn-O flexion vibrations respectively<sup>8</sup>. Among the peak intensity at  $683.99\text{ cm}^{-1}$ , this bond vibration confirmed the proper interconnectivity within the TZ-3 NCs. Furthermore, the peak position obtained at  $1630.36\text{ cm}^{-1}$  is related to the M-OH (i.e Ti-OH) and C=O stretching of titanium tetraisopropide as a precursor while the peak position observed at  $1072.22\text{ cm}^{-1}$  belongs to the M-O-C functional moiety (i.e Ti-O-C or Zn-O-C)<sup>8</sup>. The wide peak position obtained at  $3423.80\text{ cm}^{-1}$  indicates the presence of stretching frequency of the free hydroxyl (-OH) group and also  $2928.04$  to  $2844.02\text{ cm}^{-1}$  is due to the presence of symmetric and asymmetric stretching frequency of  $-\text{CH}_2$  group and C-O stretching frequency<sup>9</sup>.

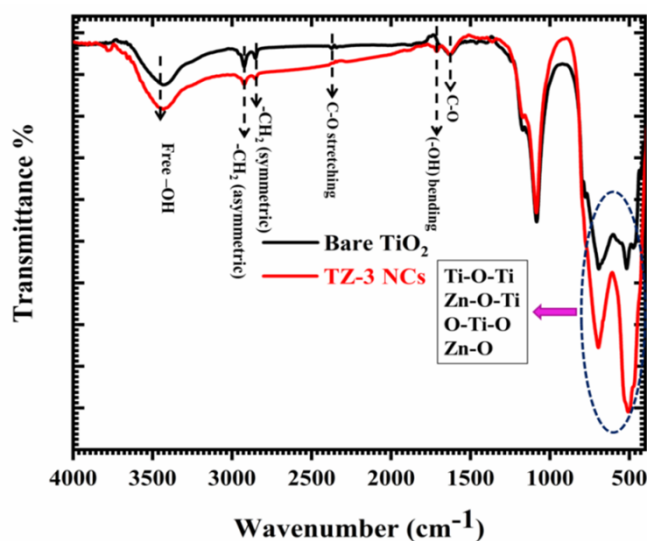

**Figure S7.** FT-IR spectra of synthesized  $\text{TiO}_2$  NPs and TZ-3 NCs.

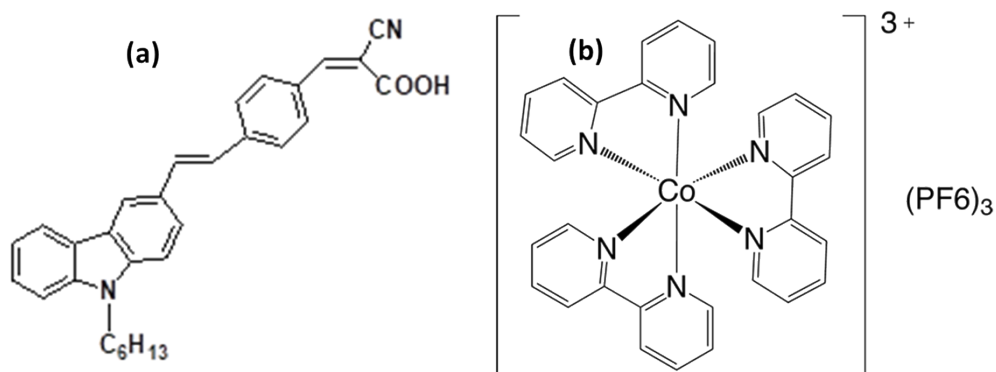

**Figure S8.** a) Structure of SK3 dye, and b) structure of redox electrolyte.

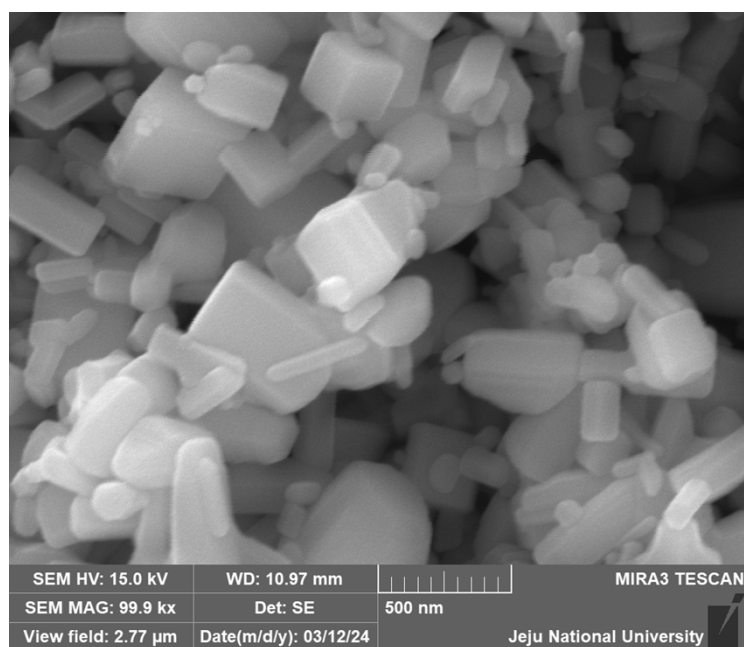

**Figure S9.** FE-SEM image of bare ZnO.



**Table S3:** Comparison of the present study with previously reported TiO<sub>2</sub>-based photoanode

| Material                          | Synthesis route                                                                          | Electrolyte                                                   | Photovoltaic Parameters |                 |       |      | Ref.                  |
|-----------------------------------|------------------------------------------------------------------------------------------|---------------------------------------------------------------|-------------------------|-----------------|-------|------|-----------------------|
|                                   |                                                                                          |                                                               | J <sub>SC</sub>         | V <sub>OC</sub> | FF    | η    |                       |
| TiO <sub>2</sub> /ZnO NCs         | Simple combined hydrolysis and refluxing method                                          | I <sub>3</sub> <sup>-</sup> /I <sup>-</sup>                   | 2.56                    | 0.63            | 57    | 0.91 | 3                     |
| TiO <sub>2</sub> / ZnO core-shell | Drop casting method                                                                      | I <sub>3</sub> <sup>-</sup> /I <sup>-</sup>                   | 2.1                     | 0.54            | 49    | 0.55 | 3                     |
| TiO <sub>2</sub> /ZnO core-shell  | sol-gel–reflux method                                                                    | Oxide-dye-electrolyte interface                               | 1.33                    | 0.606           | 58.8  | 0.53 | 10                    |
| TiO <sub>2</sub> /ZnO NCs         | Two-step sol-gel and hydrothermal method                                                 | Liquid electrolyte                                            | 1.60                    | 0.59            | 59.4  | 0.56 | 11                    |
| ZnO/ TiO <sub>2</sub> core-shell  | Combination of chemical growth and direct current (DC) magnetron sputtering (MS) method. | Liquid electrolyte                                            | 1.792                   | 0.665           | 31    | 0.35 | 12                    |
| TiO <sub>2</sub> / ZnO NCs        | Sol-gel processes                                                                        | PEO–PVDF–HFP–MMT                                              | 3.3                     | 0.65            | 77    | 1.6  | 13                    |
| TiO <sub>2</sub> NP/ZnO nanofiber | Electro spinning and calcination                                                         | (I <sup>-</sup> /I <sub>3</sub> <sup>-</sup> )                | 12.83                   | 0.764           | 66.69 | 6.54 | 14                    |
| ZnO/CuO NCs                       | Co-precipitation route                                                                   | I <sub>3</sub> <sup>-</sup> /I <sup>-</sup>                   | 6.17                    | 0.67            | 0.63  | 2.57 | 15                    |
| TiO <sub>2</sub> /ZnO NCs         | Ex-situ sol-gel method                                                                   | Co <sup>2+</sup> /Co <sup>3+</sup> -based PEO–PEG polymer gel | 7.17                    | 0.89            | 67.12 | 4.30 | <b>Present report</b> |

## References

1. Pawar, P. S. *et al.* Optimized Nb-Doped TiO<sub>2</sub>/rGO Nanocomposites for Assessment of Photovoltaic Performance With Metal-Free Dye and Polymer Gel Electrolyte. *ChemistrySelect* **9**, e202402098 (2024).
2. Zhao, Y. *et al.* Zn-doped TiO<sub>2</sub> nanoparticles with high photocatalytic activity synthesized by hydrogen–oxygen diffusion flame. *Appl. Catal. B Environ.* **79**, 208–215 (2008).
3. Manikandan, V. S., Palai, A. K., Mohanty, S. & Nayak, S. K. Eosin-Y sensitized core-shell TiO<sub>2</sub>-ZnO nano-structured photoanodes for dye-sensitized solar cell applications.

4. Prasannalakshmi, P. & Shanmugam, N. Fabrication of TiO<sub>2</sub>/ZnO nanocomposites for solar energy driven photocatalysis. *Mater. Sci. Semicond. Process.* **61**, 114–124 (2017).
5. Bhogaita, M. & Devaprakasam, D. Hybrid photoanode of TiO<sub>2</sub>-ZnO synthesized by co-precipitation route for dye-sensitized solar cell using phyllanthus reticulatas pigment sensitizer. *Sol. Energy* **214**, 517–530 (2021).
6. Pugazhendhi, K. *et al.* Plasmonic TiO<sub>2</sub>/Al@ZnO nanocomposite-based novel dye-sensitized solar cell with 11.4% power conversion efficiency. *Sol. Energy* **215**, 443–450 (2021).
7. Pawar, P. S. *et al.* Design and photovoltaic studies of W@TiO<sub>2</sub>/rGO nanocomposites with polymer gel electrolyte. *New J. Chem.* **47**, 21825–21833 (2023).
8. Pezhooli, N., Rahimi, J., Hasti, F. & Maleki, A. Synthesis and evaluation of composite - TiO<sub>2</sub>@ ZnO quantum dots on hybrid nanostructure perovskite solar cell. *Sci. Rep.* 1–9 (2022) doi:10.1038/s41598-022-13903-w.
9. Pawar, P. S. *et al.* nanocomposites with polymer gel electrolyte †. 21825–21833 (2023) doi:10.1039/d3nj04205g.
10. Ako, R. T. *et al.* DSSCs with ZnO@TiO<sub>2</sub> core–shell photoanodes showing improved Voc: Modification of energy gradients and potential barriers with Cd and Mg ion dopants. *Sol. Energy Mater. Sol. Cells* **157**, 18–27 (2016).
11. Marimuthu, T., Anandhan, N., Thangamuthu, R., Mummoothi, M. & Ravi, G. Graphical abstract SC. *J. Alloys Compd.* (2016) doi:10.1016/j.jallcom.2016.03.219.
12. Zhang, Z., Hu, Y., Qin, F. & Ding, Y. DC sputtering assisted nano-branched core–shell TiO<sub>2</sub>/ZnO electrodes for application in dye-sensitized solar cells. *Appl. Surf. Sci.* **376**, 10–15 (2016).
13. Prabakaran, K., Mohanty, S. & Nayak, S. K. Author ' s Accepted Manuscript. *Ceram. Int.* (2015) doi:10.1016/j.ceramint.2015.05.151.
14. Yang, M. *et al.* TiO<sub>2</sub> nanoparticle/nanofiber–ZnO photoanode for the enhancement of the efficiency of dye-sensitized solar cells. *RSC Adv.* **7**, 41738–41744 (2017).
15. Kanimozhi, S., Prabu, K. M., Thambidurai, S. & Suresh, S. Dye-sensitized solar cell performance and photocatalytic activity enhancement using binary zinc oxide-copper oxide nanocomposites prepared via co-precipitation route. *Ceram. Int.* **47**, 30234–30246 (2021).
